# Supplementary material for: Application of a novel cationic iridium(iii) complex as a red phosphor in warm white light-emitting diodes
Source: Royal Society of Chemistry journal article supplement (doi:10.1039/c5nj02032h), 2015-01-01
Supplement: c5nj02032h1.pdf [file c5nj02032h1.pdf]

## Electronic Supplementary Information

**Manuscript ID:** NJ-ART-08-2015-002032 (submitted to *New Journal of Chemistry*)

**Title:** A novel cationic iridium(III) complex as red phosphor applied in warm white light-emitting diodes

**Authors:** Guoyun Meng, Zeyu Chen, Huaijun Tang,\* Yong Liu, Liying Wei and Zhengliang Wang\*

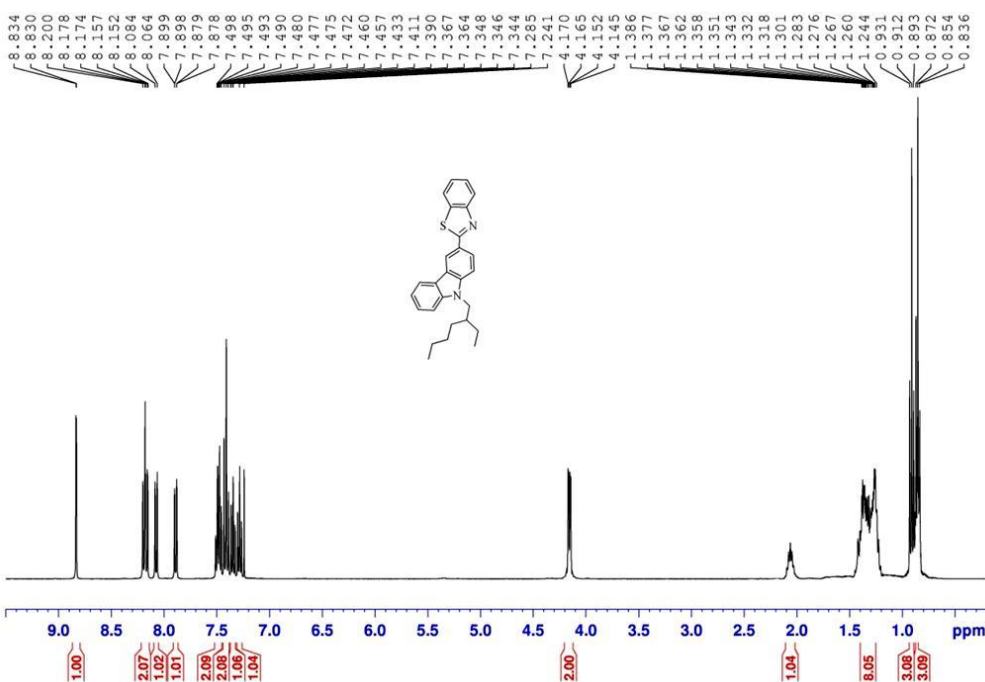

**Figure S1.**  $^1\text{H}$  NMR spectra of 2-(9-(2-ethylhexyl)-9H-carbazol-3-yl)benzo[d]thiazole (compound **3**)

$^1\text{H}$  NMR (400MHz,  $\text{CDCl}_3$ , ppm),  $\delta$ : 8.83 (d, 1H,  $^3J = 1.6$  Hz, ArH),  $\delta$ : 8.15–8.20 (m, 2H, ArH),  $\delta$ : 8.07 (d, 1H,  $^3J = 8.0$  Hz, ArH),  $\delta$ : 7.89 (dd, 1H,  $^3J = 8.0$  Hz,  $^4J = 0.4$  Hz, ArH),  $\delta$ : 7.24–7.50 (m, 6H, ArH),  $\delta$ : 4.16 (dd, 2H,  $^3J = 7.6$  Hz,  $^4J = 2.0$  Hz,  $^4J = 3.5$  Hz,  $-\text{N}-\text{CH}_2-$ ),  $\delta$ : 2.01–2.11 (m, 1H,  $-\text{CH}<$ ),  $\delta$ : 1.26–1.39 (m, 8H, alkyl-H),  $\delta$ : 0.91 (t, 3H,  $^3J = 5.7$  Hz,  $-\text{CH}_3$ ),  $\delta$ : 0.86 (t, 3H,  $^3J = 4.4$  Hz,  $-\text{CH}_3$ ).

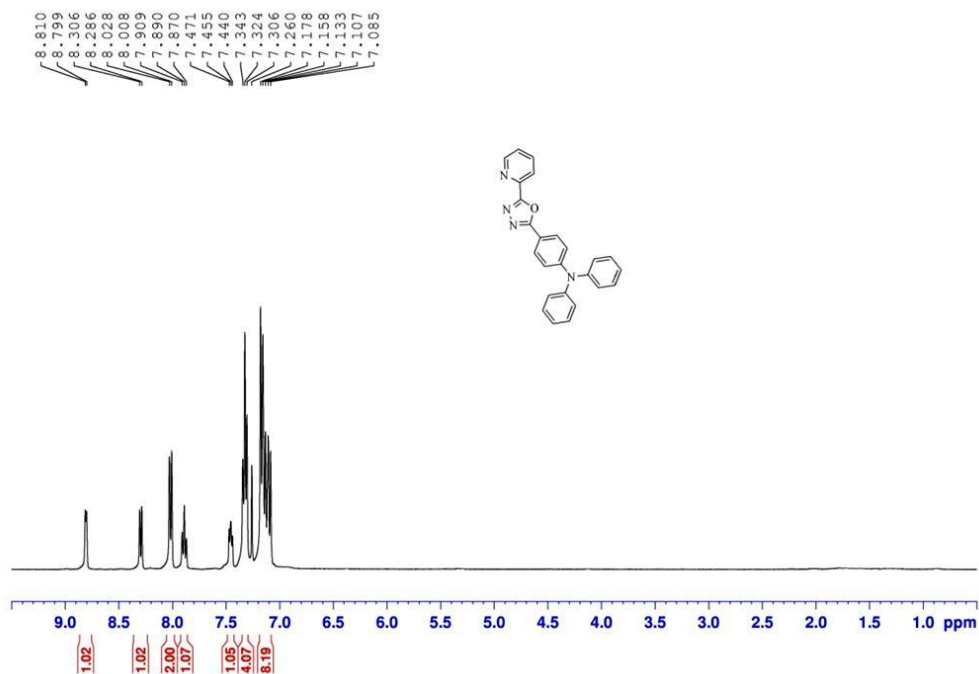

**Figure S2.** <sup>1</sup>H NMR spectra of N,N-diphenyl-4-(5-(pyridin-2-yl)-1,3,4-oxadiazol-2-yl)aniline (compound **8**)

<sup>1</sup>H NMR (400MHz, CDCl<sub>3</sub>, ppm),  $\delta$ : 8.80 (d, 1H,  $^3J = 4.4$  Hz, pyridine-H),  $\delta$ : 8.30 (d, 1H,  $^3J = 8.0$  Hz, ArH),  $\delta$ : 8.02 (d, 2H,  $^3J = 8.0$  Hz, ArH),  $\delta$ : 7.89 (t, 1H,  $^3J = 8.0$  Hz, ArH),  $\delta$ : 7.46 (t, 1H,  $^3J = 6.4$  Hz, ArH),  $\delta$ : 7.32 (t, 4H,  $^3J = 7.6$  Hz, ArH),  $\delta$ : 7.09-7.18 (m, 8H, ArH).

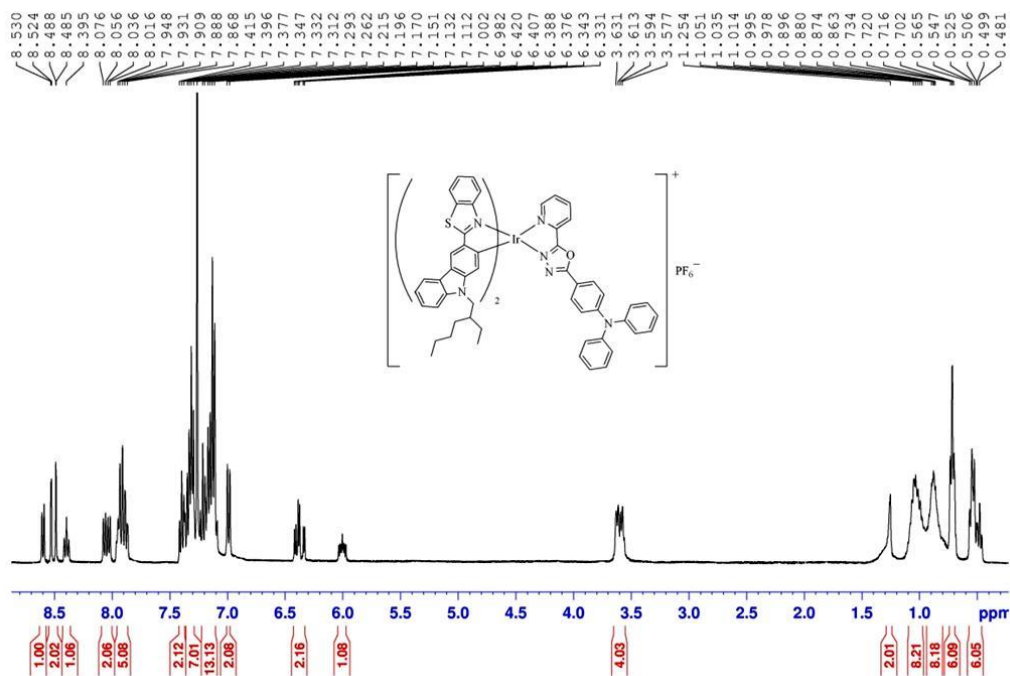

**Figure S3.**  $^1\text{H}$  NMR spectra of the cationic iridium(III) complex

$^1\text{H}$  NMR (400MHz,  $\text{CDCl}_3$ , ppm),  $\delta$ : 8.60 (d, 1H,  $^3J = 7.6$  Hz, ArH),  $\delta$ : 8.53 (s, 1H, ArH), 8.49 (s, 1H, ArH),  $\delta$ : 8.40 (t, 1H,  $^3J = 8.0$  Hz, ArH),  $\delta$ : 8.05 (q, 2H,  $^3J = 8.0$  Hz, ArH),  $\delta$ : 7.87–7.95 (m, 5H, ArH),  $\delta$ : 7.40 (t, 2H,  $^3J = 7.6$  Hz, ArH),  $\delta$ : 7.29–7.35 (m, 7H, ArH),  $\delta$ : 7.11–7.22 (m, 13H, ArH),  $\delta$ : 6.99 (d, 2H,  $^3J = 8.0$  Hz, ArH),  $\delta$ : 6.33–6.42 (m, 2H, ArH),  $\delta$ : 6.01 (m, 1H, ArH),  $\delta$ : 3.60 (dd, 4H,  $^3J = 14.4$  Hz,  $^4J = 6.8$  Hz,  $-\text{N}-\text{CH}_2-$ ),  $\delta$ : 1.25 (s, 2H,  $-\text{CH}<$ ),  $\delta$ : 0.86–1.05 (m, 16H, alkyl-H),  $\delta$ : 0.72 (t, 6H,  $^3J = 5.6$  Hz,  $-\text{CH}_3$ ),  $\delta$ : 0.46–0.57 (m, 6H,  $-\text{CH}_3$ )

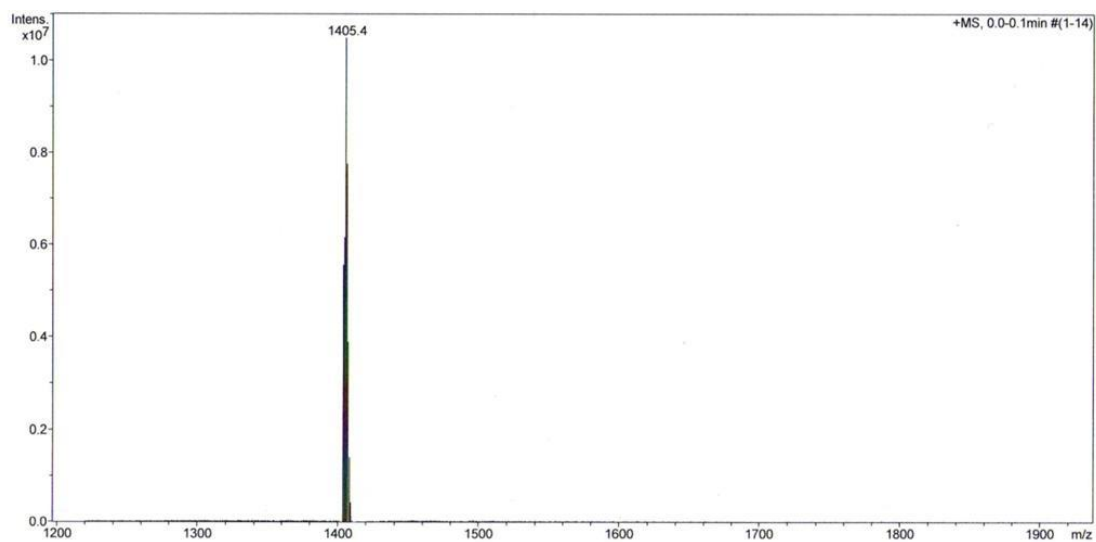

**Figure S4.** MS spectra of the cationic iridium(III) complex

ESI-MS(m/Z): 1405.4 [M-PF<sub>6</sub>]<sup>+</sup>
